# Supplementary material
Source: PubMed Central journal article supplement (PMC7726701)
Supplement: jama-e2023517-s004.pdf [file jama-e2023517-s004.pdf]

Writing Committee and Steering Committee for the RELAx Collaborative Group. Effect of a lower vs higher positive end-expiratory pressure strategy on ventilator-free days in ICU patients without ARDS: a randomized clinical trial. *JAMA*. Published online December 9, 2020. doi:10.1001/jama.2020.23517

#### **Data**

**Data available:** Yes

**Data types:** Deidentified participant data, Data dictionary

**How to access data:** Data will be made available upon approval of formal request at the study's steering committee. The request shall be sent to Prof. Marcus J. Schultz, email-address [marcus.j.schultz@gmail.com](mailto:marcus.j.schultz@gmail.com).

**When available:** With publication

#### **Supporting Documents**

**Document types:** Statistical/analytic code

**How to access documents:** The request for the analytic code shall be sent to Prof. Marcus J. Schultz, email-address [marcus.j.schultz@gmail.com](mailto:marcus.j.schultz@gmail.com).

**When available:** With publication

#### **Additional Information**

**Who can access the data:** Researchers who provide a methodologically sound proposal to achieve aims in the approved proposal

**Types of analyses:** Specified purposes only

**Mechanisms of data availability:** With signed data access agreement.

**Any additional restrictions:** N/A.
